# Supplementary material for: Pollen transfer and patterns of reproductive success in pure and mixed populations of nectariferous Platanthera bifolia and P. chlorantha (Orchidaceae)
Source: PeerJ. 2022 Jun 13;10:e13362. doi: 10.7717/peerj.13362 (PMC9202541; doi:10.7717/peerj.13362)
Supplement: Supplemental Information 5 [file peerj-10-13362-s005.docx]

| **Family** | **Species** | LIN_16 | LIN_17 | BON_16 | BON_17 | POB_16 | POB_17 | SMOL_16 | SMOL_17 | POG_16 | POG_17 | BF_17 | BC_17 |
| --- | --- | --- | --- | --- | --- | --- | --- | --- | --- | --- | --- | --- | --- |
| Arctidae | *Diacrysiasannio* |  |  |  |  | 3 | 1 | 1 | 1 |  |  | 1 |  |
| *Atolmisrubricollis* |  |  |  |  |  |  | 1 |  |  |  |  |  |
| *Miltochristaminiata* |  |  |  |  |  |  |  |  | 1 |  | 3 |  |
| *Cybosiamesomella* |  |  |  |  |  |  |  |  |  |  | 3 |  |
| *Spilosomalubricipeda* | 1 | 5 | 10 | 2 | 5 |  | 6 | 10 | 18 | 1 | 2 | 24 |
| *Spilosomaurticae* |  |  |  |  |  |  |  |  |  |  |  |  |
| *Spilarctialutea* |  |  | 3 | 9 | 1 |  | 5 | 11 | 6 |  | 21 | 16 |
| Cossidae | *Phragmitaeciacastanea* |  |  |  |  |  |  |  |  | 2 | 4 |  |  |
| Drepanidae | *Tetheaor* |  |  | 1 |  |  |  |  |  |  |  |  |  |
| *Drepanafalcataria* |  |  | 1 |  |  |  |  |  |  | 1 |  |  |
| *Drepanacurvulata* |  |  |  |  |  |  |  |  | 1 |  |  |  |
| *Habrosynepyritoides* |  |  |  |  |  |  |  |  |  |  | 1 | 3 |
| Geometridae | *Calospilossylvata* |  |  |  |  |  |  |  |  | 1 |  | 5 | 1 |
| *Lomaspilismarginata* |  |  | 1 |  | 1 |  | 2 | 1 |  |  |  | 1 |
| *Macaria notata* |  |  | 1 |  |  |  |  | 2 |  |  |  |  |
| *Macarialiturata* |  |  |  |  | 3 |  | 1 |  |  | 2 | 1 |  |
| *Macariasignaria* |  |  | 1 |  |  |  |  |  |  |  |  |  |
| *Chiasmiaclathrata* | 1 | 4 | 2 |  | 7 | 1 | 2 | 17 | 2 | 1 |  | 1 |
| *Cepphisadvenaria* |  |  | 1 | 1 |  |  |  | 1 | 1 | 1 |  |  |
| *Plagodisdolablaria* |  |  | 1 |  |  |  |  |  |  |  | 1 |  |
| *Opisthograptisluteolata* |  |  |  |  |  |  |  |  |  |  |  |  |
| *Angeronaprunaria* |  |  | 8 | 1 |  |  | 1 |  | 4 | 2 | 5 | 3 |
| *Antonechlorissmaragdaria* |  |  |  |  |  |  |  |  |  |  |  | 1 |
| *Jodisputata* |  |  |  |  |  |  |  |  |  |  |  |  |
| *Hypomecisroboraria* |  |  |  |  |  |  |  | 1 | 4 | 3 | 8 | 3 |
| *Hypomecispunctinalis* |  |  | 2 |  |  |  |  |  | 1 | 1 | 4 | 2 |
| *Caberapussaria* |  | 1 |  |  |  | 1 |  |  | 2 |  | 1 |  |
| *Caberaexanthemata* |  |  |  |  |  |  |  | 1 | 1 | 2 |  |  |
| *Scopulaimmorata*1 |  | 1 |  |  | 1 |  | 1 | 2 | 2 | 3 | 1 |  |
| *Scopulaornata* |  |  |  |  |  |  |  |  |  |  |  |  |
| *Scopulaimmutata* |  |  | 5 |  |  |  | 1 |  |  |  |  |  |
| *Xanthorhoemontanata* |  |  | 2 | 8 |  |  |  | 1 | 1 |  |  |  |
| *Cosmorhoeocellata* |  |  |  |  |  |  |  |  |  |  |  |  |
| *Chloroclystatruncata* |  |  |  | 1 |  |  |  | 1 |  |  | 1 |  |
| *Eupitheciatripunctaria* |  |  |  |  |  |  |  |  | 1 |  |  |  |
| *Eupitheciateniuata* |  |  |  |  |  |  |  |  | 2 |  |  |  |
| *Eupitheciaplumbeolata* |  |  |  |  |  |  |  |  |  |  |  |  |
| *Hydraeliaflammeolaria* |  | 1 |  | 1 |  |  |  |  | 1 | 1 |  |  |
| *Hydraeliasylvata* |  |  |  |  |  |  |  |  |  |  |  |  |
| *Ectropiscrepuscualria* |  |  | 2 |  |  |  |  |  |  |  |  | 2 |
| *Timandracomae* |  |  | 1 |  | 4 |  |  |  |  |  |  |  |
| *Idea avarsata* |  |  | 1 |  |  |  |  |  | 1 | 2 |  | 1 |
| *Idea bisellata* |  |  |  |  |  |  |  |  |  |  | 2 |  |
| *Eulithisprunata* |  |  | 1 |  |  |  |  |  |  |  |  |  |
| *Eulithismellinata* |  |  |  |  |  |  |  |  | 1 | 1 |  |  |
| *Ecliptopteracapitata* |  |  | 5 | 3 |  |  |  | 1 |  |  |  | 1 |
| *Ligdiaadustata* |  |  | 2 |  |  |  |  |  | 1 |  |  |  |
| *Siona lineata* |  |  |  |  | 2 |  | 2 | 4 |  |  |  |  |
| *Perizomaalchemillata* |  |  |  |  |  |  |  |  |  |  | 1 | 1 |
| *Perizomafavofasciata* |  | 1 |  |  |  |  |  |  |  |  |  | 1 |
| *Plagodispulveraia* |  |  |  | 1 |  |  |  |  |  |  |  |  |
| *Mesolecaalbicillata* |  |  |  | 1 |  |  |  |  |  |  | 1 |  |
| *Rheumapteraundulata* |  |  |  | 1 |  |  |  |  |  |  |  |  |
| *Eustromareticulata* |  |  |  | 1 |  |  |  |  |  |  |  |  |
| *Alcisribeata* |  |  |  |  |  |  |  |  |  |  | 1 |  |
| *Alcisrependata* |  |  |  |  |  |  |  | 3 |  |  |  | 3 |
| *Camtogramabilineata* |  |  |  |  |  |  |  | 1 |  |  |  |  |
| *Aploceraplagiata*12.3***; **8.96** |  |  |  |  |  |  |  | 1 |  |  |  |  |
| *Pterapherapteryxsexalata* |  |  |  |  |  |  |  | 1 |  |  |  | 2 |
| *Petrophorachlorosata* |  |  |  |  |  |  |  |  | 23 | 12 |  |  |
| *Aethalurapunctulata* |  |  |  |  |  |  |  |  | 5 |  | 2 |  |
| *Cyclophoraalbipunctata* |  |  |  |  |  |  |  |  | 1 |  |  |  |
| *Cyclophoraquercimontaria* |  |  |  |  |  |  |  |  |  |  | 1 |  |
| *Cyclophorapendularia* |  |  |  |  |  |  |  |  |  |  |  | 1 |
| *Orthonamavitata* |  |  |  |  |  |  |  |  | 1 |  |  |  |
| *Catarhoecuculata* |  |  |  |  |  |  |  |  | 1 |  |  |  |
| *Catarrhoerubidata* |  |  |  |  |  |  |  |  |  |  |  | 1 |
| *Epirhoealternata* |  |  |  |  |  |  |  |  | 5 | 2 |  | 6 |
| *Epirrhoetartruensis* |  |  |  |  |  |  |  |  |  |  |  | 2 |
| *Hydriomenafurcata* |  |  |  |  |  |  |  |  | 1 |  | 1 | 1 |
| *Euchoecanebulata* |  |  |  |  |  |  |  |  | 1 |  |  | 6 |
| *Geometra papilionaria* |  |  |  |  |  |  |  |  |  |  | 1 |  |
| *Bupaluspiniaria* |  |  |  |  |  |  |  |  |  |  | 1 |  |
| *Comibenabajularia* |  |  |  |  |  |  |  |  |  |  | 1 |  |
| *Euphiaunangulata* |  |  |  |  |  |  |  |  |  |  | 2 |  |
| *Bistonbetularia* |  |  |  |  |  |  |  |  |  |  |  | 1 |
| *Colostygiapectinataria* |  |  |  |  |  |  |  |  |  |  |  | 1 |
| *Euphiaunangulata* |  |  |  |  |  |  |  |  |  |  |  | 1 |
| *Ashtenaalbulata* |  |  |  |  |  |  |  |  |  |  |  | 1 |
| *Macaraiaalternata* |  |  |  |  |  |  |  |  | 7 | 5 |  | 1 |
| *Chariospilatesexanthemata* |  |  |  |  |  |  |  |  |  | 2 |  |  |
| Lasiocampidae | *Macrothylaciarubi* |  |  |  |  |  |  |  |  |  | 1 |  |  |
| *Sphinx ligustri*136-42*; **43.97** |  |  |  |  |  |  |  | 1 |  |  |  |  |
| *Eutrixpotatoria* |  |  |  |  |  |  |  |  | 1 | 1 |  |  |
| *Gastropachaqurecifolia* |  |  |  |  |  |  |  |  |  |  | 1 |  |
| *Lasiocampatrifolii* |  |  |  |  |  |  |  |  |  |  | 1 |  |
| Limantridae | *Caliterapudibunda* |  |  |  | 2 |  |  |  |  |  |  |  |  |
| Lomacodidae | *Apodalimacodes* |  |  | 1 |  |  |  |  |  |  |  | 31 |  |
| Noctuidae | *Lygephilapastinum* |  |  |  |  |  |  |  | 1 |  |  |  |  |
| *Lygephilaviciae* |  |  |  |  |  |  | 2 |  |  |  |  |  |
| *Autographa gamma*  15-16*/**; 16.2*** 2 |  |  | 1 |  |  |  |  |  |  |  |  |  |
| *Autographa jota* |  |  | 2 |  |  |  |  |  |  |  |  | 1 |
| *Abrostolatripartita*  12-13** |  |  | 2 |  |  |  |  |  |  |  |  |  |
| *Protodeltotepygarga* |  |  | 1 |  |  |  |  | 4 | 6 | 4 |  | 11 |
| *Pseudeustrotiacandidula* |  |  |  |  |  |  |  |  |  |  |  | 1 |
| *Cuculliaumbratica* 2 |  |  |  |  |  |  |  |  |  |  |  |  |
| *Hoplodrinablanda* |  |  |  |  |  |  |  |  |  |  |  |  |
| *Euplexialucipara* |  |  |  |  |  |  |  |  |  | 1 |  | 1 |
| *Apameacrenata* |  |  | 1 |  | 1 |  | 1 |  |  |  |  |  |
| *Apameamonoglypha*12.1*** |  |  |  |  | 4 |  | 4 |  |  |  |  |  |
| *Melanchrapisi* |  |  |  |  |  |  |  |  |  |  |  |  |
| *Polianebulosa* |  |  |  |  | 1 |  | 1 |  |  |  |  | 1 |
| *Oligiastrigilis* |  | 1 |  |  |  |  |  |  |  | 1 |  |  |
| *Oligiafasciuncula* |  |  |  |  |  |  |  | 2 | 1 |  |  |  |
| *Oligiaversicolor* |  |  |  |  |  |  |  |  |  |  |  | 1 |
| *Lacanobiathalassina* |  |  |  | 1 |  |  |  |  |  |  |  |  |
| *Lacanobiasuasa* |  |  |  |  |  |  |  |  |  |  |  |  |
| *Lacanobiasplendens* |  |  |  |  |  |  |  |  | 5 |  |  |  |
| *Discestratrifolii* |  |  |  |  |  |  |  | 1 |  |  | 3 |  |
| *Mythimnaconigera* |  |  | 1 |  | 6 |  | 2 |  |  |  |  |  |
| *Mythimnapallens* |  |  |  |  |  |  | 1 |  |  |  |  |  |
| *Mythimnaturca* |  |  | 1 |  | 2 |  | 1 | 1 |  |  |  | 4 |
| *Mythimnaimpura* |  |  |  |  |  |  |  |  |  |  |  |  |
| *Mythimnaalbipuncta* |  |  |  |  |  |  |  |  |  |  |  |  |
| *Mythimnapudorina* |  |  |  |  |  |  |  |  | 1 | 3 |  | 1 |
| *Mythimnaflammea* |  |  |  |  |  |  |  |  | 8 |  |  |  |
| *Mythimnaferrago* |  |  |  |  |  |  |  |  |  |  |  | 1 |
| *Axyliaputris* |  |  |  |  |  |  |  |  |  |  |  |  |
| *Ochropleuraplecta* |  |  |  |  |  |  |  |  |  |  |  |  |
| *Noctuapronuba*13-15**2 |  |  | 3 |  |  | 1 |  |  |  |  |  |  |
| *Diarsiabrunnea* |  |  |  |  |  |  |  |  |  |  |  |  |
| *Diarsiadahli* |  |  |  |  |  |  |  | 1 |  |  |  |  |
| *Diarsiamendica***7.27** |  |  | 3 | 18 | 1 | 1 | 2 |  |  |  |  |  |
| *Anaplectoidesprasina* |  |  |  |  |  |  |  |  |  |  |  |  |
| *Rhyaciasimulans* |  |  |  |  |  |  |  |  |  |  |  |  |
| *Agrotisexclamationis* |  |  | 22 |  | 11 |  | 5 |  | 1 | 1 |  |  |
| *Acronictarumicis* |  |  | 1 |  |  |  |  |  |  |  |  |  |
| *Acronictaleporina* |  |  |  |  |  |  |  |  | 1 |  |  |  |
| *Acronictacuspis* |  |  |  |  |  |  |  |  | 1 | 1 |  |  |
| *Acronictamegacephala* |  | 1 |  |  | , |  | 1 |  | 1 | 2 | 4 | 10 |
| *Herminia grisealis* |  |  | 3 |  |  |  |  | 1 |  |  |  |  |
| *Herminia trasiclinnaris* |  |  |  |  |  |  |  |  | 6 | 5 | 5 | 4 |
| *Ligephilaviciae* |  |  | 1 |  |  |  |  |  |  |  |  |  |
| *Diachrysiachrysitis*  15-16** |  |  | 1 |  |  |  |  |  |  | 1 |  |  |
| *Cryphiaalgae* |  |  | 2 |  |  |  |  |  |  |  |  |  |
| *Charanycatrigrammica* |  |  | 5 |  |  |  |  |  |  |  |  |  |
| *Dypterygiascabriuscula* |  |  | 3 |  |  |  |  | 2 |  |  |  |  |
| *Rusina ferruginea* |  |  | 3 |  | 3 |  | 4 | 2 |  |  | 1 | 1 |
| *Hada plebeja***9.66** |  |  | 3 | 1 |  |  | 1 | 1 |  |  |  |  |
| *Xestiatriangulum* |  |  | 2 |  |  |  | 6 | 3 |  |  | 3 | 7 |
| *Xestia baj* |  |  |  |  |  |  |  |  |  |  |  | 1 |
| *Rivulasericealis*5** |  |  |  |  |  |  |  | 1 | 1 | 1 |  |  |
| *Polypogontentacularia* |  |  |  |  |  |  |  | 1 |  |  | 3 |  |
| *Bena bicolorana* |  |  |  |  |  |  |  | 1 |  |  |  |  |
| *Deltotebankiana* |  |  |  |  |  |  |  |  | 4 | 1 |  | 2 |
| *Deltoteuncula* |  |  |  |  |  |  |  |  |  |  |  | 1 |
| *Elaphriavenustula* |  |  |  |  |  |  |  |  | 1 | 1 |  | 1 |
| *Paradiarsiapunicea* |  |  |  |  |  |  |  |  | 1 |  |  |  |
| *Hadenabicruris* |  |  |  |  |  |  |  |  |  |  | 1 |  |
| *Hadenarivularis***36.7** |  |  |  |  |  |  |  |  |  |  |  | 1 |
| *Zonclognathatarsipennalis* |  |  |  |  |  |  |  |  |  |  | 2 |  |
| *Rivilasericealis* |  |  |  |  |  |  |  |  |  |  |  | 1 |
| *Hypenacrasalis* |  |  |  |  |  |  |  |  |  |  |  | 1 |
| *Hypenaproboscidalis* |  |  |  |  |  |  |  |  |  |  |  | 1 |
| *Ygogasignifera* |  |  |  |  |  |  |  |  |  |  |  | 1 |
| *Colobochylasalicalis* |  |  |  |  |  |  |  |  |  |  |  | 1 |
| *Macrochilocribrumalis* |  |  |  |  |  |  |  |  |  |  |  | 1 |
| *Thetellafluctuosa* |  |  |  |  |  |  |  |  |  |  |  | 1 |
| *Tracheaatriplicis* |  |  |  |  |  |  |  |  |  | 1 |  |  |
| Nolidae | *Eariaschlorana* |  |  |  |  |  |  |  |  |  |  |  |  |
| Notodontidae | *Gluphisacrenata* |  |  |  |  |  |  |  |  |  |  | 9 | 6 |
| *Stauropus fagi* |  |  | 1 |  |  |  |  |  | 1 | 3 | 2 |  |
| *Phalerabucephala* |  |  | 1 |  | 5 |  | 2 |  |  |  | 3 | 3 |
| *Ptilodoncapucina* |  |  |  | 1 |  |  |  |  |  |  |  |  |
| *Drymoniadodonea* |  |  |  |  |  |  |  |  |  |  | 3 |  |
| *Closterapigra* |  |  |  |  |  |  |  |  | 1 |  |  |  |
| Sphingidae | *Smerinthusocellata* |  |  | 1 |  |  |  |  |  |  |  |  | 4 |
| *Lathoepopuli* |  |  | 3 |  |  |  |  |  |  | 3 |  |  |
| *Hyloicuspinastri*1*;* 29.5***; **28.24; 28.07** |  |  |  |  |  | 1 |  | 1 | 1 |  | 3 |  |
| *Deilephilaelpenor*  250-280*; 22.5***;**23.7** |  |  |  |  |  |  |  |  | 1 |  |  |  |
|  | | | | | | | | | | | | | |
| The number of species | ∑ 170 | 2 | 8 | 45 | 17 | 19 | 6 | 25 | 34 | 49 | 35 | 42 | 56 |
| The number of individuals | ∑ 920 | 2 | 15 | 119 | 53 | 61 | 6 | 56 | 84 | 142 | 77 | 147 | 158 |

Insect species observed on *Platantherabifolia*/*chlorantha* inflorescences by1Boberg et al. 2014; 2 Esposito et al. 2017; tongue length (mm)*Willmer 2011,

** Sexton 2014, ***Nilsson 1983; in bold: our observations
